# Supplementary material for: SERS activity and spectroscopic properties of Zn and ZnO nanostructures obtained by electrochemical and green chemistry methods for applications in biology and medicine
Source: Royal Society of Chemistry journal article supplement (doi:10.1039/d0cp03517c), 2020-01-01
Supplement: d0cp03517c1.pdf [file d0cp03517c1.pdf]

## SERS activity and spectroscopic properties of Zn and ZnO nanostructures obtained by electrochemical and green chemistry methods for applications in biology and medicine

Received 00<sup>th</sup> September 2020,  
Accepted 00<sup>th</sup> xxxxx 2020

DOI: 10.1039/x0xx00000x

Edyta Proniewicz<sup>a\*</sup>, Agnieszka Tąta<sup>a</sup>, Anna Wójcik<sup>b</sup>, Maria Starowicz<sup>a</sup>, Joanna Pacek<sup>c</sup>, and Marcin Molenda<sup>c</sup>

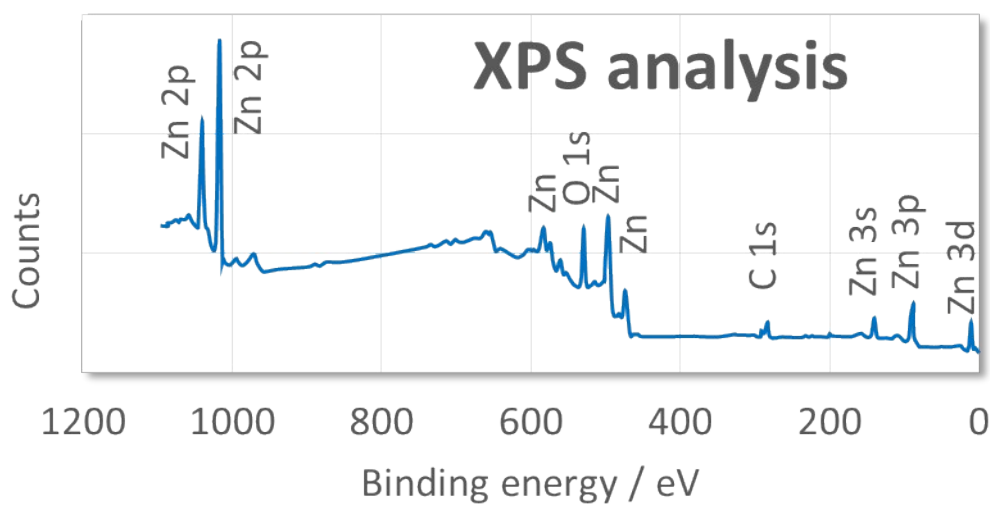

Figure 1S. XPS spectrum of ZnONPs-GC obtained from banana peels.

<sup>a</sup> Faculty of Foundry Engineering, AGH University of Science and Technology, 30-059 Krakow, Poland.

<sup>b</sup> Institute of Metallurgy and Materials Science of Polish Academy of Science, 30-059 Krakow, 25 Reymonta St. Poland.

<sup>c</sup> Faculty of Chemistry, Jagiellonian University, Gronostajowa 2, 30-387 Krakow, Poland

\*Correspondence to: E.P. (e-mail: proniewi@agh.edu.pl; Phone: +48-12-617-34-96; Fax: +48-12-617-5297)

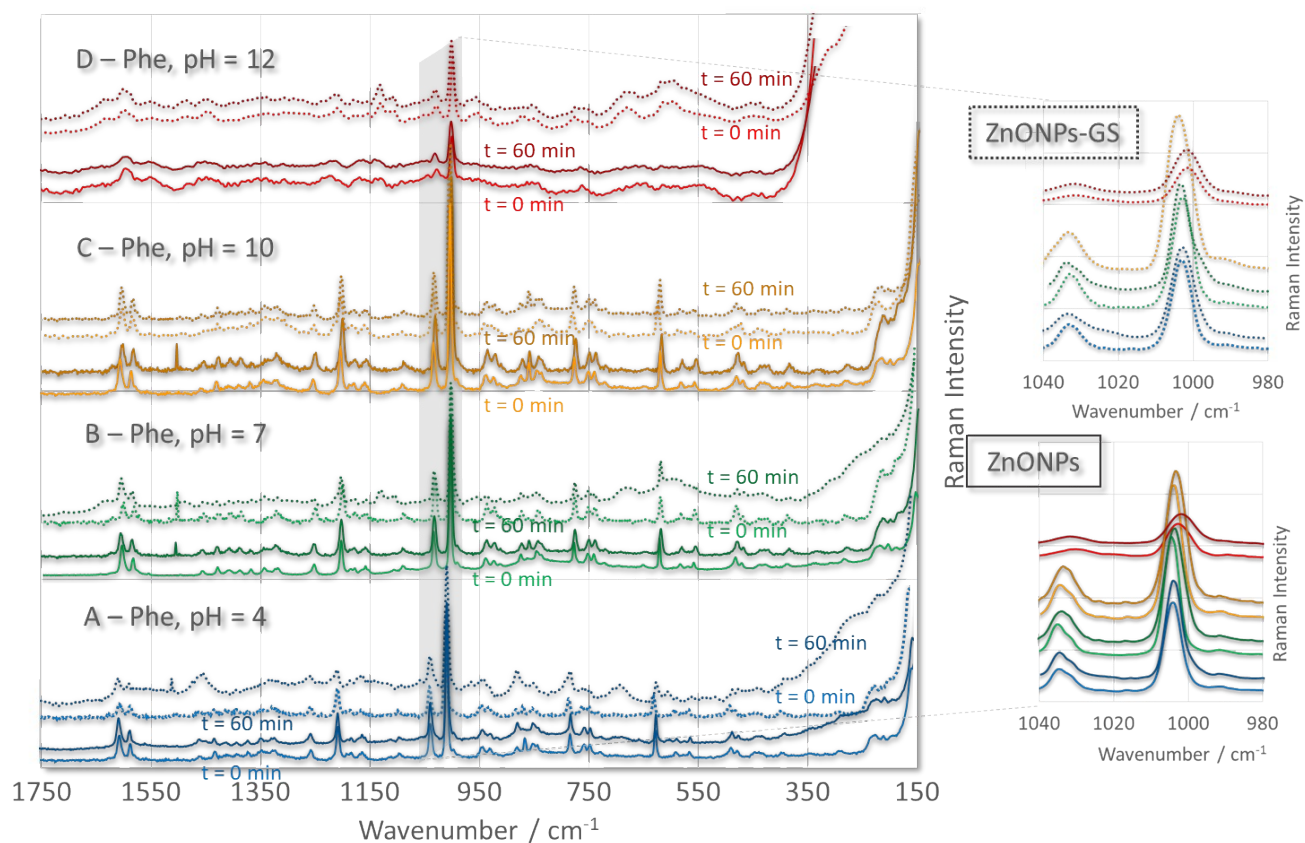

Figure 2S. SERS spectra of Phe adsorbent on ZnONPs and ZnONPs-GS at different pH and time.
